# Supplementary material for: Innovation system formation in international development cooperation: The role of intermediaries in urban sanitation
Source: Oxford University Press journal article supplement (doi:10.1093/scipol/scaa015), 2020-01-25
Supplement: scaa015_supplementary_data.docx [file scaa015_supplementary_data.docx]

# Appendix

| Table A. Interviewees | | | |
| --- | --- | --- | --- |
|  | **Position** | **Organization** | **Location** |
| 1 | Researcher | Research institute | Switzerland |
| 2 | Manager | Research institute | Sweden |
| 3 | Researcher | Research institute | Switzerland |
| 4 | Consultant | International development agency | Germany |
| 5 | Researcher/Coordinator | Research Institute / Consultancy | Switzerland |
| 6 | Researcher | Research institute | Sweden |
| 7 | Manager | International development agency | Germany |
| 8 | Manager | Non-Governmental Organization | US |
| 9 | Consultant | Consultancy | UK/Brazil |
| 10 | Researcher | Research institute | South Africa |
| 11 | Consultant | International Non-Governmental Organization | UK |
| 12 | Manager | Foundation | US |
| 13 | Manager | International Non-Governmental | Bangladesh |
| 14 | Advisor | International development organization | Germany |
| 15 | Consultant | International development agency | Germany |
| 16 | Manager | Research institute | Sweden/Kenya |
| 17 | Coordinator | Research institute | Switzerland |
| 18 | Coordinator | International development organization | Germany/Lebanon |
| 19 | Researcher | Research institute | Switzerland |
| 20 | Researcher | University | UK |
| 21 | Researcher | Research institute | Switzerland |

List of books, reports, and webpages used for the case study in addition to the interviews:

- Abraham, B. (2011). *Concept note: SuSanA engagement in the five year drive for sustainable sanitation - Draft*. Retrieved from <https://www.susana.org/en/knowledge-hub/resources-and-publications/susana-publications/details/1039>
- Andersson, K., Rosemarin, A., Lamizana, B., Kvarnström, E., McConville, J., Seidu, R., . . . Trimmer, C. (2016). *Sanitation, Wastewater Management and Sustainability: from Waste Disposal to Resource Recovery*. Retrieved from Nairobi and Stockholm: United Nations Environment Programme and Stockholm Environment Institute: <https://wedocs.unep.org/bitstream/handle/20.500.11822/8465/-Sanitation,_wastewater_management_and_sustainability_From_waste_disposal_to_resource_recovery-2016sanitation_wastewater_management_and_sustainabilit.pdf?sequence=2&isAllowed=y>
- Black, M. (1998). *Learning What Works. A 20 Year Retrospective View on International Water and Sanitation Cooperation*. Retrieved from Water and Sanitation Program (WSP): <http://www.un.org/esa/sustdev/sdissues/water/InternationalWaterDecade1981-1990_review.pdf>
- Blackett, I., & Hawkins, P. (2017). *FSM Innovation. Case Studies on the Business, Policy and Technology of Faecal Sludge Management*. Retrieved from <https://www.susana.org/en/knowledge-hub/resources-and-publications/library/details/2760>
- Coursera. (2018). Introduction to Faecal Sludge Management. (Accessed 11 October 2018), Retrieved from <https://www.coursera.org/learn/faecalsludge>
- FSM Toolbox (2018). Faecal sludge management toolbox. (Accessed 11 October 2018), Retrieved from <http://www.fsmtoolbox.com>
- IRCWD. (1992). *Septage and Nightsoil Management ("SNM")*. Retrieved from <https://www.eawag.ch/fileadmin/Domain1/Abteilungen/sandec/publikationen/ircwd/IRCWD_news_26.pdf>
- Jacob, N., Saxena, S., Sahahpuri, A., & Nath, V. (2017). *Swachh Bharat: Vision to Mission*. Retrieved from India Sanitation Coalition & Sustainable Sanitation Alliance (SuSanA): <http://www.susana.org/en/knowledge-hub/resources-and-publications/library/details/2777>
- Hutton, G., & Haller, L. (2004). *Evaluation of the Costs and Benefits of Water and Sanitation Improvements at the Global Level*. Retrieved from Water, Sanitation and Health Protection of the Human Environment. World Health Organization (WHO). Geneva: <http://www.who.int/water_sanitation_health/wsh0404.pdf>
- Hutton, G., Haller, L., & Bartram, J. (2007). Global cost-benefit analysis of water supply and sanitation interventions. *Journal of Water and Health, 5*(4), 481.
- Ingallinella, A. M., Sanguinetti, G., Koottatep, T., Montangero, A., & Strauss, M. (2002). The challenge of faecal sludge management in urban areas - strategies, regulations and treatment options. *Water Science and Technology, 46*(10), 285-294.
- Koné, D., Strauss, M., & Saywell, D. (2007). *Towards an Improved Faecal Sludge Management (FSM), Proceedings of the 1st International Symposium and Workshop on Faecal Sludge Management (FSM) Policy. Dakar, Senegal, 9-12 May 2006*.
- Langergraber, G., & Muellegger, E. (2005). Ecological Sanitation—a way to solve global sanitation problems? *Environment International, 31*(3), 433-444.
- Muller, M. S. (1997). *The collection of household excreta: the operation of services in urban low income neighbourhoods*. Retrieved from <https://www.ircwash.org/resources/collection-household-excreta-operation-services-urban-low-income-neighbourhoods>
- Ohler, S. (2017). *10 years SuSanA: How the changed sanitation paradigm contributes to the Sustainable Development Goals. Outcome report of the 10th SuSanA Anniversary Celebration January 2017 Eschborn, Germany*. Retrieved from <http://www.susana.org/_resources/documents/default/3-2868-7-1506594966.pdf>
- Panesar, A. (2009). *Introduction to SuSanA and its key messages - Short overview about SuSanA and its five key messages.* Retrieved from <https://www.susana.org/en/knowledge-hub/resources-and-publications/library/details/960>
- Sandec. (2005). *Sandec News No. 6*. Retrieved from <https://www.eawag.ch/fileadmin/Domain1/Abteilungen/sandec/publikationen/news/sandec_news_6.pdf>
- Sandec. (2008). *Sandec News No. 9*. Retrieved from <https://www.eawag.ch/fileadmin/Domain1/Abteilungen/sandec/publikationen/news/sandec_news_9.pdf>
- SEI. (n.d.). Discussing Gates Foundation sanitation research on the SuSanA Forum. (Accessed 28 August 2018), Retrieved from <https://www.sei.org/projects-and-tools/projects/discussing-gates-foundation-sanitation-research-on-the-susana-forum/>
- Strande, L., Ronteltap, M., & Brdjanovic, D. (2014). *Fecal Sludge Management. Systems Approach for Implementation and Operation* Retrieved from London: IWA Publishing: <https://www.eawag.ch/fileadmin/Domain1/Abteilungen/sandec/publikationen/EWM/Book/FSM_Ch0_Table_of_Contents.pdf>
- Strande, L., Schoebitz, L., Bischoff, F., Ddiba, D., Okello, F., Englund, M., . . . Niwagaba, C. B. (2018). Methods to reliably estimate faecal sludge quantities and qualities for the design of treatment technologies and management solutions. *Journal of Environmental Management, 223*, 898-907.
- Strauss, M. (1993). Treatment of Sludges from On-Site Sanitation Systems ("SOS"). *IRCWD News*. Retrieved from <https://www.eawag.ch/fileadmin/Domain1/Abteilungen/sandec/publikationen/ircwd/IRCWD_news_27.pdf>
- Strauss, M., & Heinss, U. (1995). *Faecal Sludge Treatment. Challenges, Process Options and Field Research: A State-of-Knowledge Report*. Retrieved from <https://www.eawag.ch/fileadmin/Domain1/Abteilungen/sandec/publikationen/news/sandec_news_1.pdf>
- Strauss, M., Heinss, U., & Montangero, A. (2000). On-site sanitation: when the pits are full--planning for resource protection in faecal sludge management. *Schriftenreihe des Vereins für Wasser-, Boden- und Lufthygiene, 105*, 353-360.
- SuSanA. (n.d.). About SuSanA (Accessed 25 May 2018), Retrieved from <https://www.susana.org/en/about/governance-structure>
- SuSanA. (n.d.). Core Group. (Accessed 18 February 2018), Retrieved from <https://www.susana.org/en/about/governance-structure/susana-core-group>
- SuSanA. (n.d). Regional Chapters. (Accessed 6 April 2018), Retrieved from <http://www.susana.org/en/knowledge-hub/regional-chapters>
- SuSanA. (2008). *Towards more sustainable sanitation solutions*. Retrieved from <https://www.susana.org/en/knowledge-hub/resources-and-publications/library/details/267>
- SuSanA. (2015). *SuSanA Indian Chapter. Concept Note*. Retrieved from <https://www.susana.org/images/documents/Regional_Chapter/SuSanA-india-chapter-2015-08-18-v1.pdf>
- SuSanA. (2012). FSM2 Conference in Durban, South Africa - Conference materials. (Accessed 25 May 2018), Retrieved from <https://www.susana.org/en/knowledge-hub/resources-and-publications/library/details/1624>
- SuSanA. (2017). *Contribution of Sustainable Sanitation to the Agenda 2030 for Sustainable Development*. Retrieved from <https://www.susana.org/en/knowledge-hub/resources-and-publications/library/details/2715>
- SuSanA. (2017). *Sustainable sanitation and the SDGs: interlinkages and opportunities. SuSanA interlinkages document.* Retrieved from <https://www.susana.org/en/knowledge-hub/resources-and-publications/library/details/2859>
- SuSanA. (2017). *SuSanA Joint Roadmap 2015 to 2018 - Towards More Sustainable Sanitation Systems - Version 1.3*. Retrieved from <https://www.susana.org/en/knowledge-hub/resources-and-publications/susana-publications/details/2867>
- SuSanA. (2018). Regional Chapters. (Accessed 6 April 2018), Retrieved from <http://www.susana.org/en/knowledge-hub/regional-chapters>
- SuSanA. (2018). MENA chapter. (Accessed 6 April 2018), Retrieved from <http://www.susana.org/en/knowledge-hub/regional-chapters/mena-chapter>
- Unknown. (2015). FSM3, 3rd International Faecal Sludge Management Conference, Hanoi, Vietnam, January 2015. (Accessed 25 May 2018), Retrieved from <https://www.susana.org/en/knowledge-hub/trainings-conference-and-events-materials/conferences/2015/259-fsm3>
- Unknown. (n.d). SuSanA Forum. (Accessed Regularly between February and October 2018), Retrieved from <https://forum.susana.org/>
- von Münch, E., Ingle, R., Mbalo, D., & Kappauf, L. (2012). *Compilation of 13 factsheets on key sustainable sanitation topics.* Retrieved from Sustainable Sanitation Alliance (SuSanA) and GIZ, Germany: <https://www.susana.org/en/knowledge-hub/resources-and-publications/library/details/1229>
- von Münch, E., & Milosevic, D. (2015). *Statistics report to monitor SuSanA Discussion Forum and library up to 30 April 2015*. Retrieved from <https://www.susana.org/_resources/documents/default/3-2042-16-1436176169.pdf>
- Wegelin-Schuringa, M., & Kodo, T. (1997). Tenancy and sanitation provision in informal settlements in Nairobi: revisiting the public latrine option *Environment & Urbanization, 9*(2).
- WHO. (2006). *Safe use of wastewater, excreta and greywater. Volume 1 Policy and regulatory aspects*. Retrieved from Geneva, World Health Organization: <http://www.who.int/water_sanitation_health/publications/gsuweg1/en/>
- WHO. (2018). *Guidelines on sanitation and health*. Retrieved from Geneva: World Health Organization: <http://www.who.int/water_sanitation_health/publications/guidelines-on-sanitation-and-health/en/>
- World Bank. (2016). Fecal Sludge Management Tools. (Accessed 11 October 2018), Retrieved from <http://www.worldbank.org/en/topic/sanitation/brief/fecal-sludge-management-tools>
- WSP. (2001). *Identifying Demand Drivers for Sanitation Technologies The Case of Ecosan in Africa*. Retrieved from Water and Sanitation Program (WSP): <https://www.wsp.org/sites/wsp.org/files/publications/af_ecosan.pdf>
- WSP. (2005). *A Review of EcoSan Experience in Eastern and Southern Africa*. Retrieved from Water and Sanitation Program (WSP): <http://documents.worldbank.org/curated/en/549691468429583254/pdf/330640af1ecosan1esa.pdf>
- WSP. (2005). *Fieldnote. Understanding Small Scale Providers of Sanitation Services: A Case Study of Kibera*. Retrieved from Nairobi, World Bank: <http://documents.worldbank.org/curated/en/356591468429540855/Understanding-small-scale-providers-of-sanitation-services-a-case-study-of-Kibera>
- WSP. (2009). *Study for Financial and Economic Analysis of Ecological Sanitation in Sub-Saharan Africa*. Retrieved from Water and Sanitation Program-Africa. The World Bank, Nairobi, Kenya: <https://www.gwp.org/globalassets/global/toolbox/references/study-for-financial-and-economic-analysis-of-ecological-sanitation-in-sub-saharan-africa-wsp-world-bank-2009.pdf>
